# Supplementary material for: Asynchronous transcription and translation of neurotransmitter-related genes characterize the initial stages of neuronal maturation in Drosophila
Source: PLoS Biol. 2023 May 19;21(5):e3002115. doi: 10.1371/journal.pbio.3002115 (PMC10234549; doi:10.1371/journal.pbio.3002115)
Supplement: S5 Data — (XLSX) [file pbio.3002115.s008.xlsx]

## Sheet: EcR-DN
Related to S5E Fig
	Control	EcR-DN
	1260000	536000
	1020000	186000
	711000	1030000
	1070000	835000
	1230000	940000
	1080000	900000
	999000	504000
	731000	1270000
		728000
		380000
Mean	1013000	730900
± SEM	71565	103964

## Sheet: PGX
Related to S5G Fig
	Control	PGX
	1250000	1140000
	1000000	846000
	1080000	695000
	1000000	1470000
	1160000	855000
		1150000
		538000
Mean	1098000	956286
± SEM	48208	119606
